# Supplementary material
Source: MDPI journal article supplement (https://www.mdpi.com/2076-3417/11/9/4231)
Supplement: s1 [file s1]

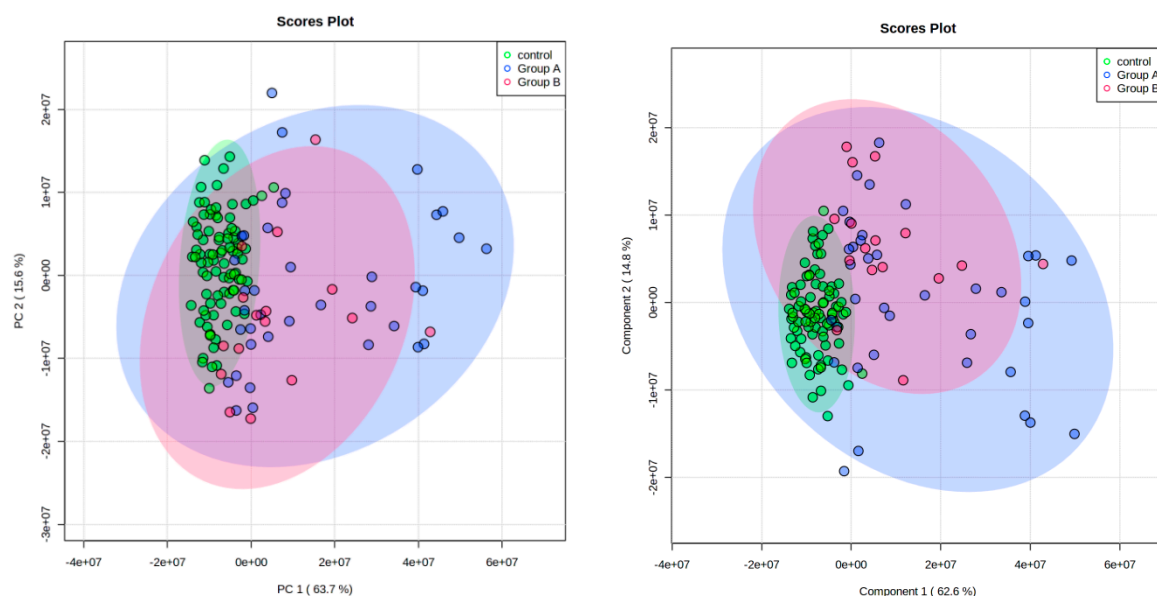

**Figure S1.** PCA (left) and PLD-DA analyses (right) of the system of patients divided into subgroups Group A and Group B on Day 1 versus controls; algorithms were fed relative concentrations of plasma metabolites, and analyses were run in metaboanalyst [16].

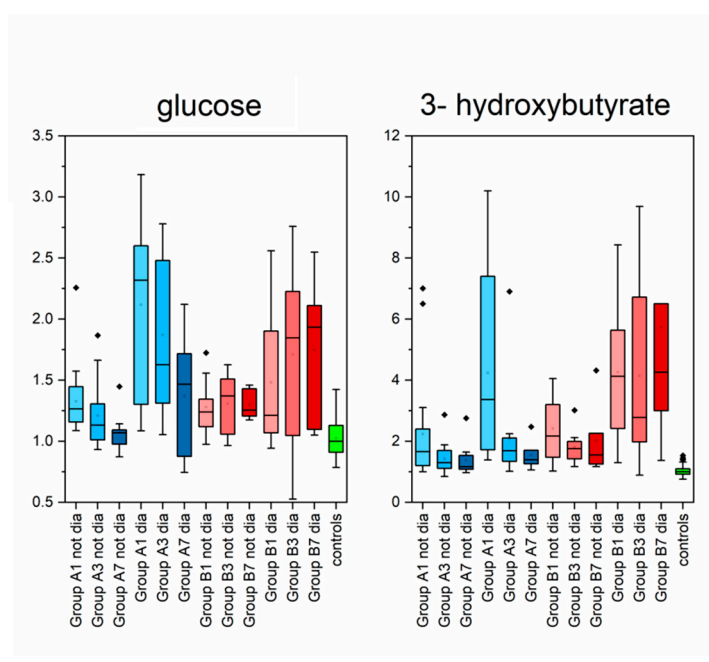

**Figure S2.** The relative changes in two metabolites closely related to energy metabolism—glucose and 3-hydroxybutyrate—where both Groups A and B were divided into subgroups according to patient diet (according to presence of diabetes) on Days 1, 3, and 7 after hospital arrival; not dia = non-diabetic patients on a normal diet, dia = diabetic patients on a diabetic diet. Values were relativized to median of controls set to 1.
